# Supplementary material
Source: Springer Nature journal article supplement (https://www.springermedizin.de/resource/supplementary/12955_2005_201_MOESM2_ESM.pdf/9559888)

### Quality of Life in Patients with SCD Compared to Other Chronic Diseases

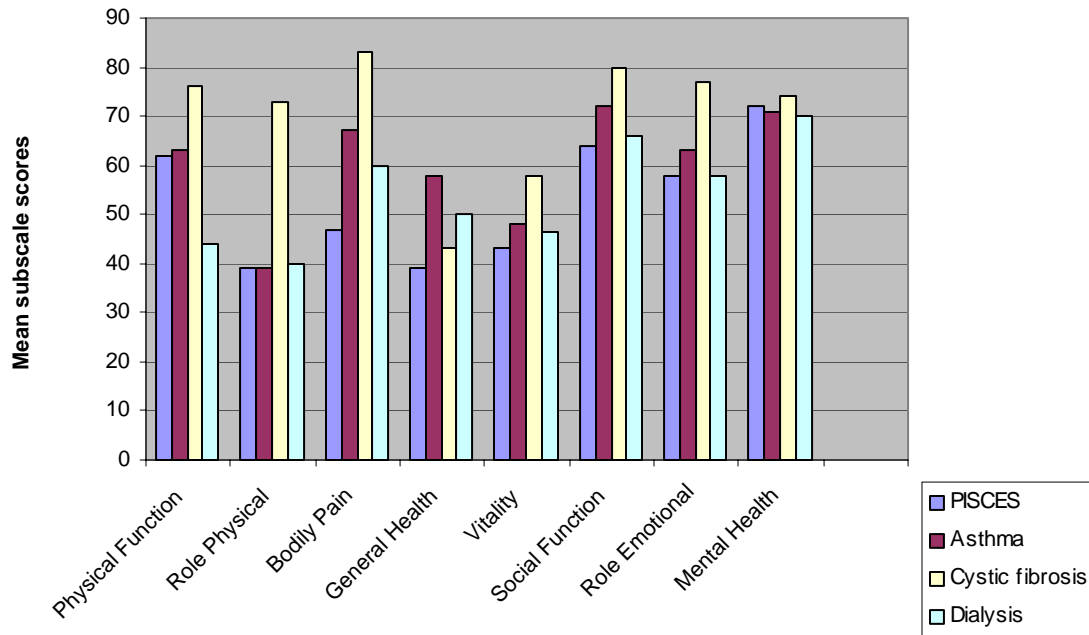

Supplement: MOESM2 [file 9559888]
